# Supplementary material for: Recurrent fusion RNA DUS4L-BCAP29 in non-cancer human tissues and cells
Source: PubMed Central journal article supplement (PMC5458218; doi:10.18632/oncotarget.16329), 2017-03-17
Supplement: oncotarget-08-31415-s001.pdf [file oncotarget-08-31415-s001.pdf]

## Recurrent fusion RNA *DUS4L-BCAP29* in non-cancer human tissues and cells

### Supplementary Materials

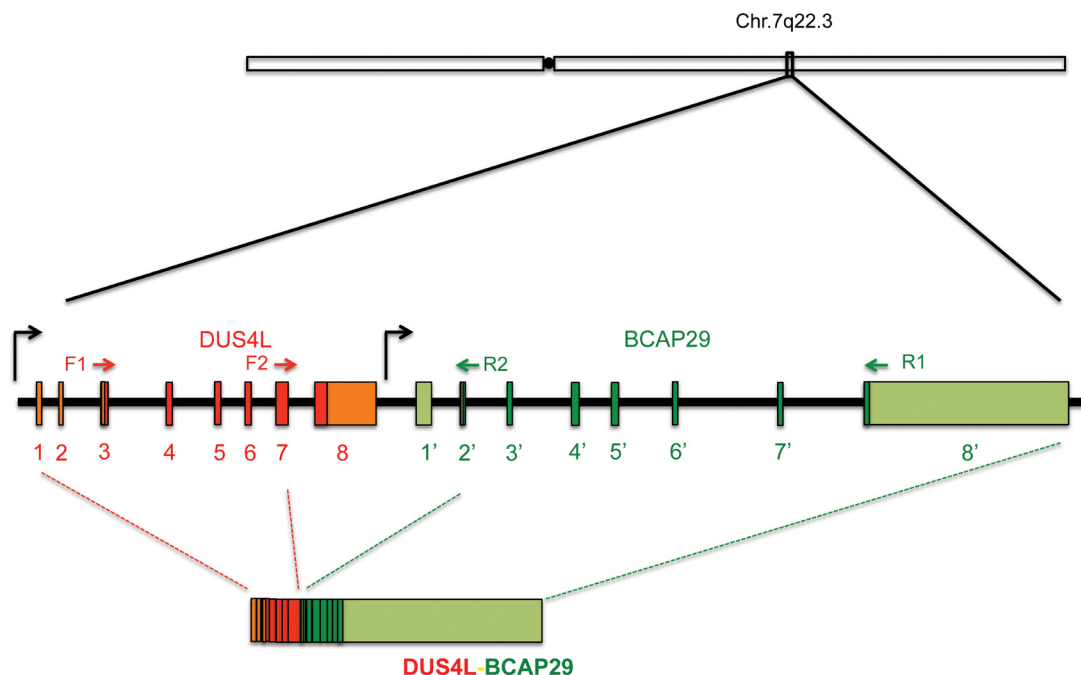

**Supplementary Figure 1: Scheme of the fusion and parental genes.** Colored blocks represent exons, whereas lines represent introns and the intergenic region. Darker color indicates the protein-coding region, and fainter color indicates the untranslated region. F1 and R1 primers were used to amplify the full-length coding region. F2 and R2 primers were used for detecting the fusion in qRT-PCR and RT-PCR.

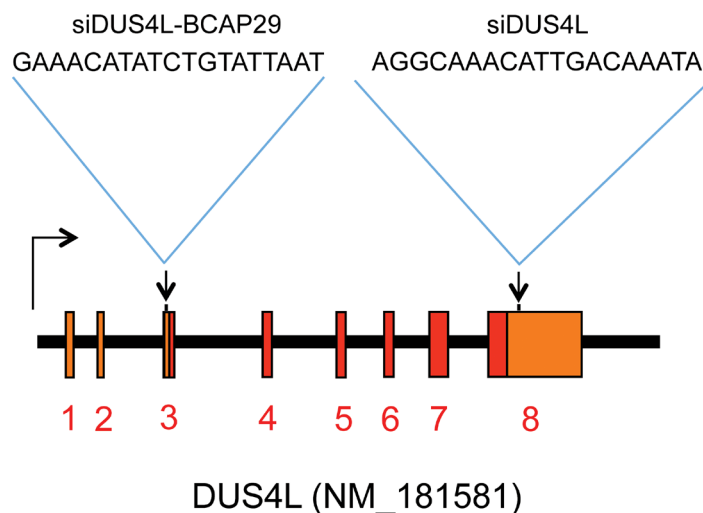

**Supplementary Figure 2: Targeting positions of siDUS4L-BCAP29 and siDUS4L.** Locations of the targeting sequence for siDUS4L-BCAP29 and siDUS4L are marked. siDUS4L-BCAP29 targets both wild type *DUS4L* and the fusion, whereas siDUS4L only targets wild type *DUS4L*.

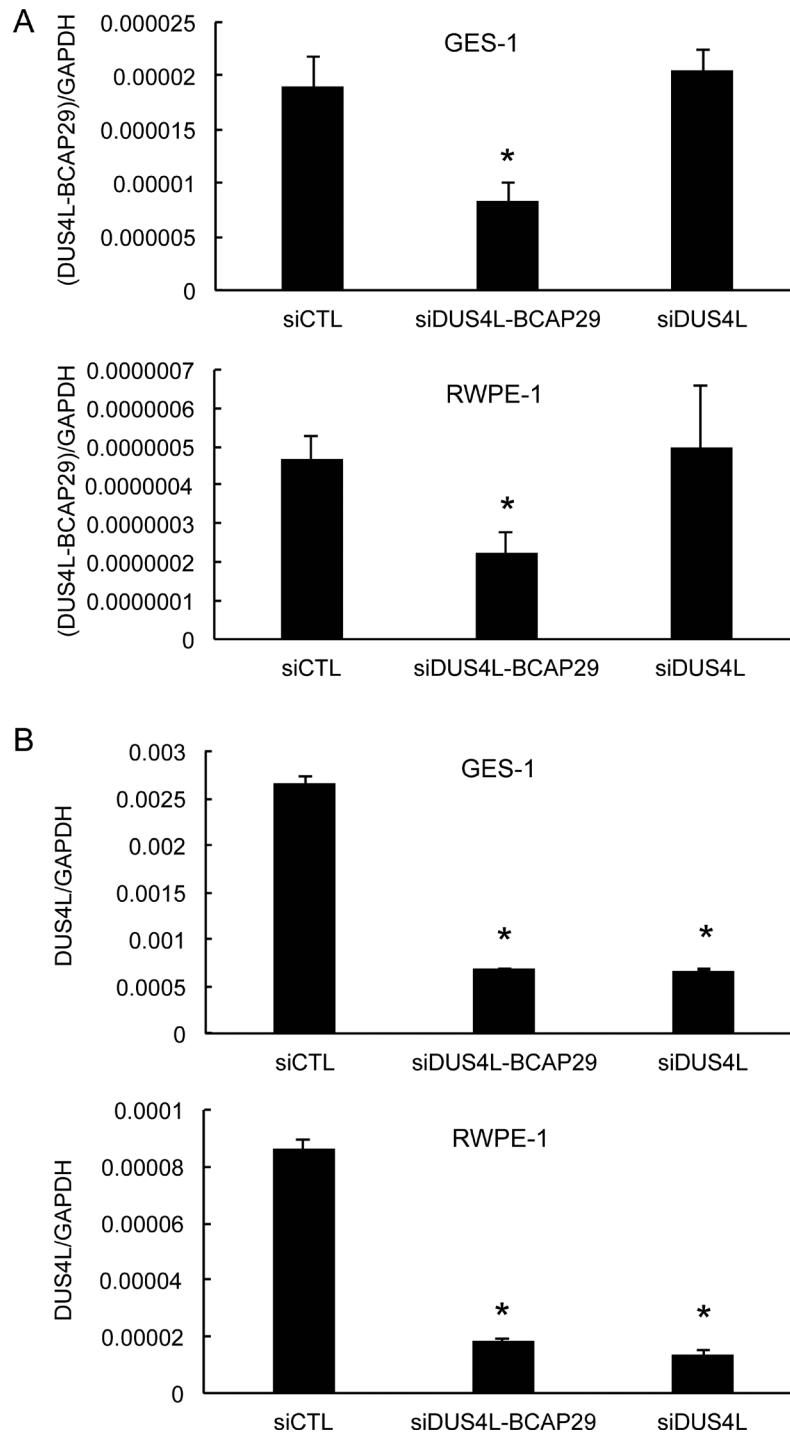

**Supplementary Figure 3: Effect of the two siRNAs.** (A) Effects of the two siRNAs on the fusion RNA in RWPE-1 and GES-1. As expected, only siDUS4L-BCAP29 silenced the fusion. (B) Effects of the two siRNAs on wild type *DUS4L* in RWPE-1 and GES-1. As expected, both silenced the wild type transcript to a similar extent. \* $p < 0.05$ .

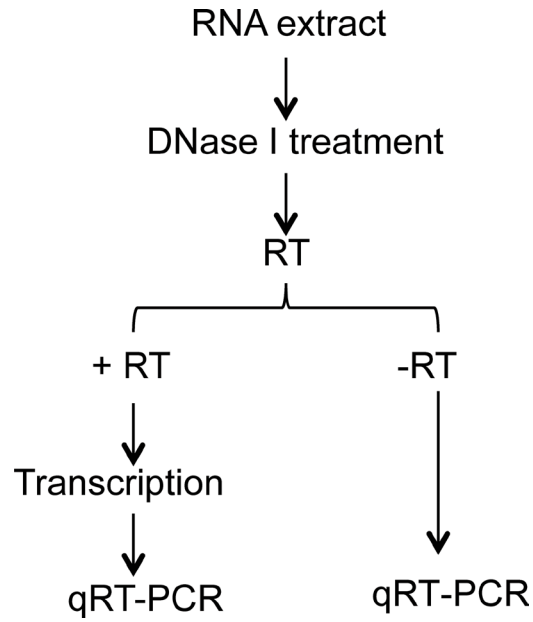

Supplementary Figure 4: The workflow of the RT-PCR to detect primary transcript running from *DUS4L* to *BCAP29*.

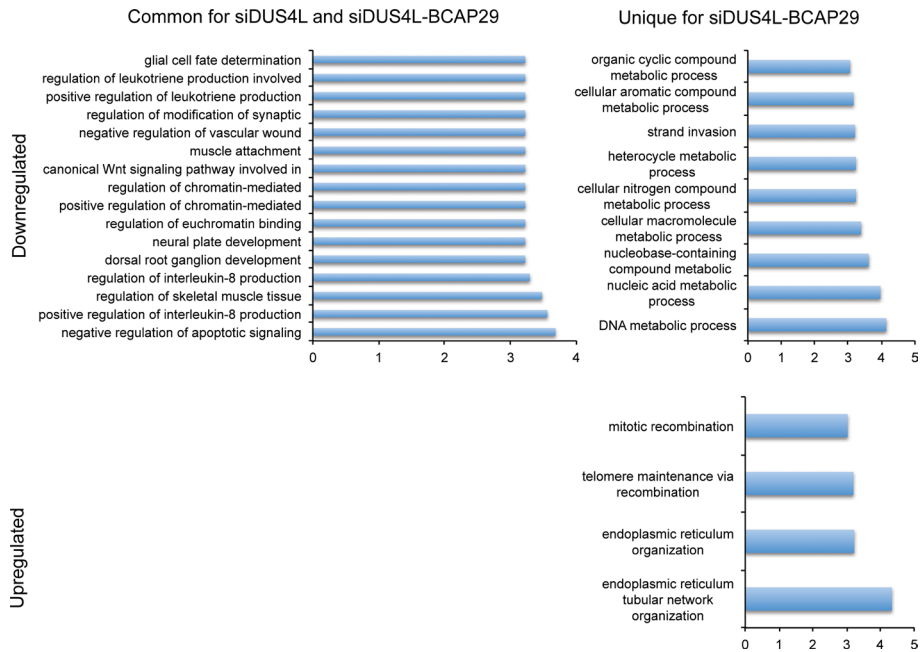

Supplementary Figure 5: Gene ontology terms enriched in siDUS4L-BCAP29 and siDUS4L compared with control siCTL. Plotted are statistical significances ( $-\text{Log}_{10}(\text{p-value})$ ) of each term. On the left, are GO terms enriched in both. On the right are terms enriched only in siDUS4L-BCAP29.
